# Supplementary material for: An orthogonal terrain-following coordinate and its preliminary tests using 2-D idealized advection experiments
Source: Copernicus journal article supplement (doi:10.5194/gmd-7-1767-2014), 2014-08-25
Supplement: Supplementary file 1 [file gmd-7-1767-2014-supplement.zip]

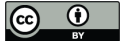

## *Supplement of*

# **An orthogonal terrain-following coordinate and its preliminary tests using 2-D idealized advection experiments**

**Y. Li et al.**

*Correspondence to:* Y. Li (liyiyuan@mail.iap.ac.cn)

- Supplement-Cover-Letter.pdf
- Supplemen140719
  - .DS\_Store
  - 3-D coordiante surfaces of the OS-coordinate140306\_final.pdf
  - Basis of the OS coordinate140306\_final.pdf
  - CoordinatesOfGridPoints140707
    - \* .DS\_Store
    - \* PointsInOsBr1.txt
    - \* PointsInOsBr2.txt
    - \* ReadMe.txt
  - Transformation of the OS-coordinate140306\_final.pdf
- \_\_MACOSX
  - Supplemen140719
    - \* .\_DS\_Store
    - \* .\_3-D coordiante surfaces of the OS-coordinate140306\_final.pdf
    - \* .\_Basis of the OS coordinate140306\_final.pdf
    - \* .\_CoordinatesOfGridPoints140707
    - \* .\_Transformation of the OS-coordinate140306\_final.pdf
    - \* CoordinatesOfGridPoints140707
